# Supplementary material
Source: Springer Nature journal article supplement (https://www.springermedizin.de/resource/supplementary/12875_2013_971_MOESM2_ESM.pdf/9435514)
Supplement: MOESM2 [file 9435514]

# Ontario

# Alberta

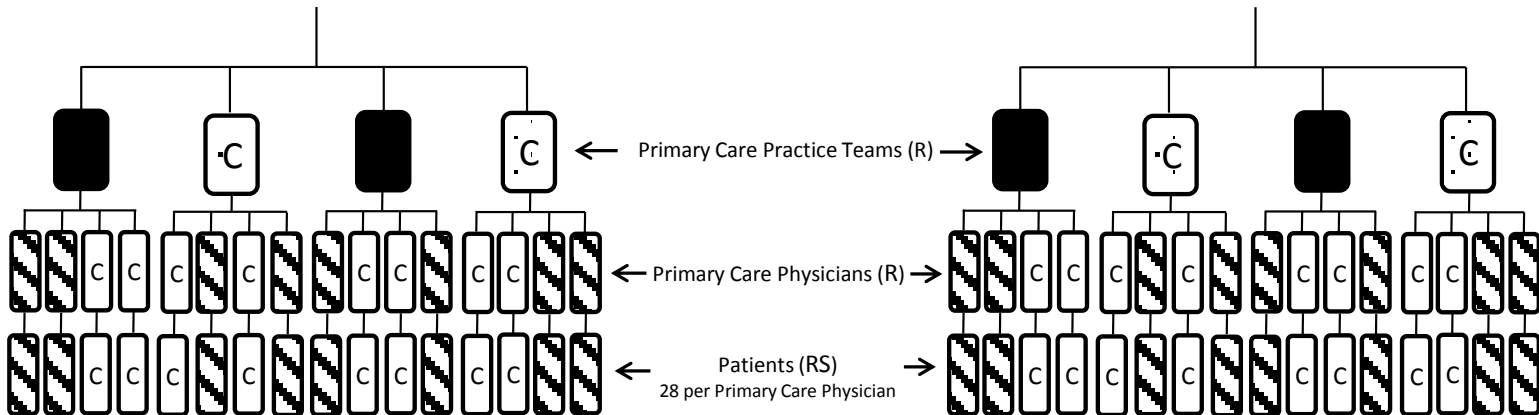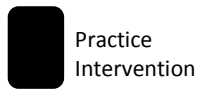

Practice Intervention

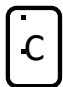

Practice Wait-list Control

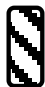

Patient Intervention

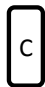

Patient Wait-list Control

R

Random Allocation

RS

Random Selection
